# Supplementary material for: Thiol-based non-injection synthesis of near-infrared Ag2S/ZnS core/shell quantum dots
Source: Royal Society of Chemistry journal article supplement (doi:10.1039/c5ra08008h), 2015-01-01
Supplement: c5ra08008h1.pdf [file c5ra08008h1.pdf]

Electronic Supplementary Information for:

## **Thiol-based non-injection synthesis of near-infrared Ag<sub>2</sub>S/ZnS core/shell quantum dots**

Peng Jiang,<sup>‡</sup> Rong Wang,<sup>‡</sup> Zilin Chen\*

\*Email: [chenzl@whu.edu.cn](mailto:chenzl@whu.edu.cn)

### **The quantum yield (QY) measurement**

The QY of the as-prepared QDs were measured using indocyanine green (ICG) as a reference standard (QY =13% in DMSO). The absorption spectra of the ICG and QDs solutions at different concentrations were recorded, the optical densities at their excitation wavelength were below 0.1 to avoid self-absorption effects. Then, the fluorescence spectra of these samples were recorded at the same under identical conditions. The QY was calculated according to the following equation:

$$\Phi_{QD} = \Phi_{Dye} \left( \frac{Grad_{QD}}{Grad_{Dye}} \right) \left( \frac{\eta_{QD}^2}{\eta_{Dye}^2} \right)$$

Where  $\Phi_{Dye}$  is the fluorescence QY of ICG,  $Grad$  is the gradient from the plot of integrated fluorescence intensity vs absorbance at excitation wavelength (600 nm), and  $\eta_{QD}$  and  $\eta_{Dye}$  are the refractive indexes of the solvents for ICG and Ag<sub>2</sub>S quantum dots, respectively.

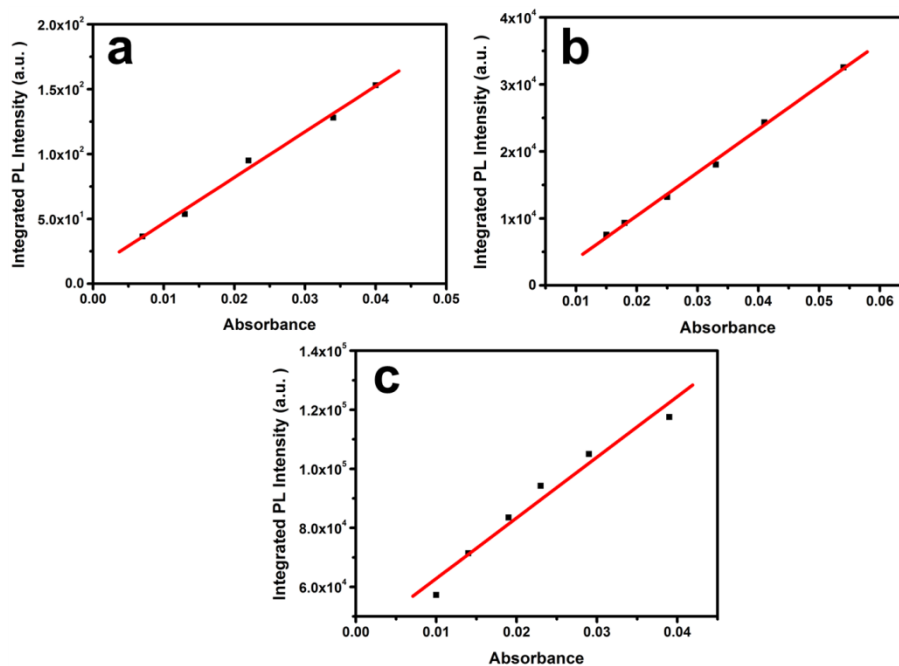

**Fig. S1** Integrated fluorescence intensity vs. optical density (absorbance) of (a) Ag<sub>2</sub>S QDs and (b) Ag<sub>2</sub>S/ZnS QDs in chloroform and (c) ICG in DMSO.

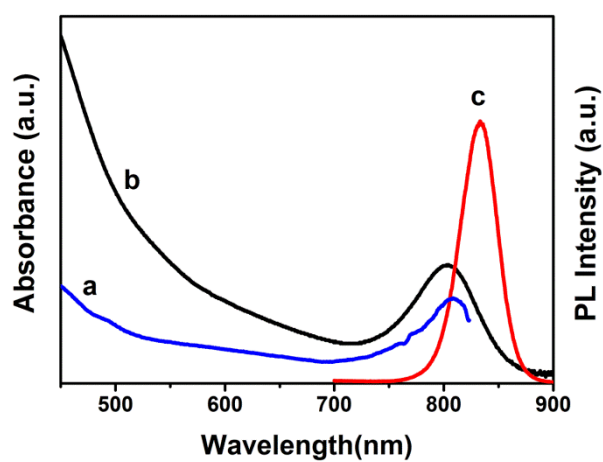

**Fig. S2** The excitation spectrum (a), absorption spectrum (b) and PL spectrum (c) of the Ag<sub>2</sub>S/ZnS QDs.

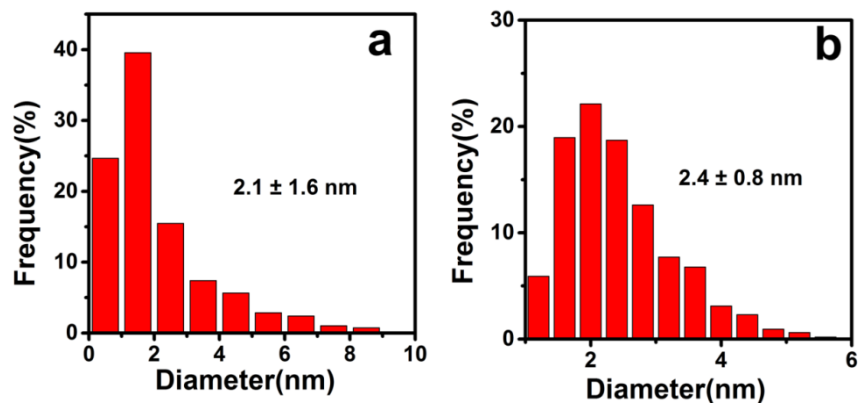

**Fig. S3** The size distribution histograms of the Ag<sub>2</sub>S (a) and Ag<sub>2</sub>S/ZnS QDs. The size distribution histograms were obtained by measuring the diameter of about 1000 particles in TEM image.

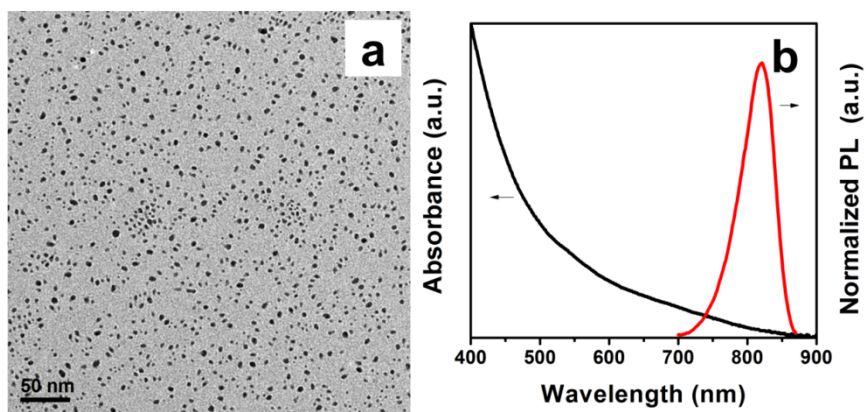

**Fig. S4** The TEM image (a), absorption spectrum (b, black line) and PL spectrum (b, red line) of the Ag<sub>2</sub>S QDs synthesized using 1-Dodecanethiol (CH<sub>3</sub>(CH<sub>2</sub>)<sub>10</sub>CH<sub>2</sub>SH) as both ligand and sulfur source.

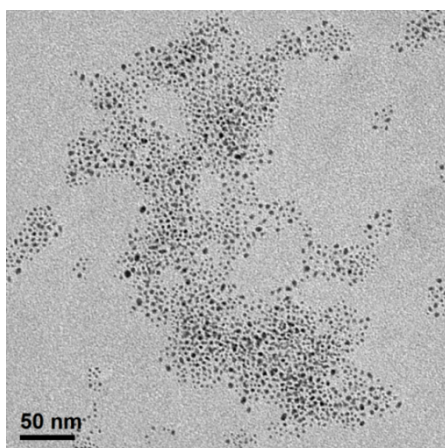

**Fig. S5** The TEM image of the Ag<sub>2</sub>S QDs synthesized using 1-Hexadecanethiol (CH<sub>3</sub>(CH<sub>2</sub>)<sub>14</sub>CH<sub>2</sub>SH) as both ligand and sulfur source.

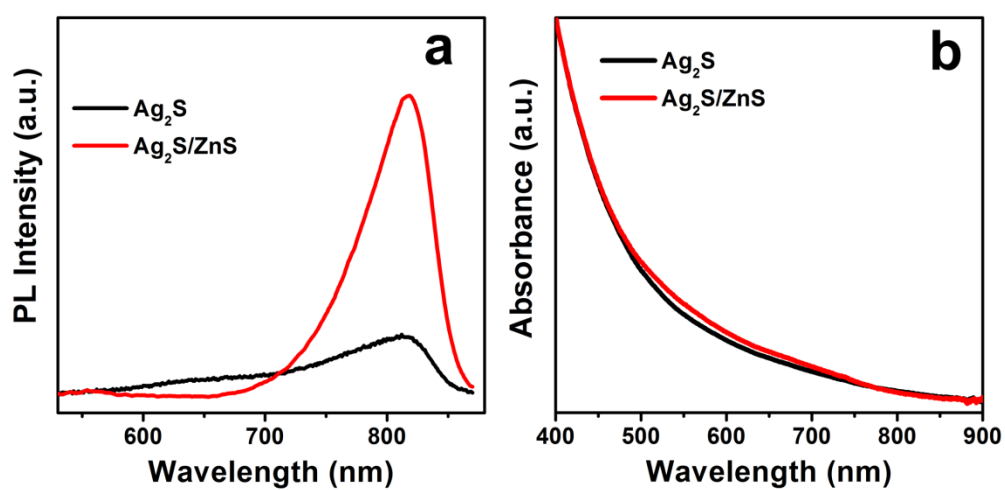

**Fig. S6** The PL spectra (a) and the corresponding absorption spectra (b) of the Ag<sub>2</sub>S and Ag<sub>2</sub>S/ZnS QDs synthesized using 1-Hexadecanethiol (CH<sub>3</sub>(CH<sub>2</sub>)<sub>14</sub>CH<sub>2</sub>SH) as both ligand and sulfur source.

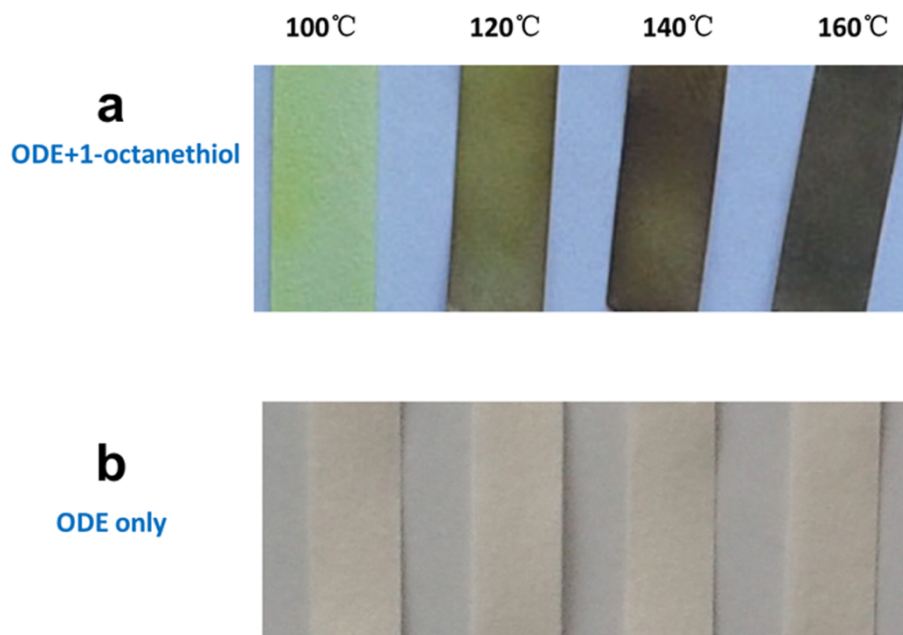

**Fig. S7** Photographs of  $\text{Pb}(\text{Ac})_2$  testing papers for the  $\text{H}_2\text{S}$  detection after exposed to the reaction atmosphere for 30 min under different temperatures; (a) ODE and 1-octanethiol in the reaction flask; (b) Only ODE in the reaction flask.

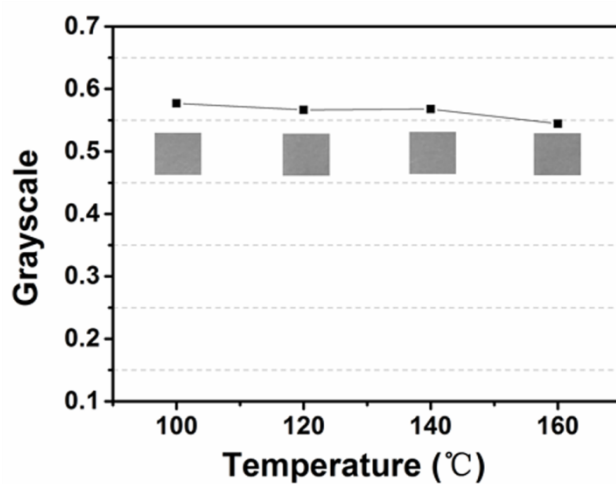

**Fig. S8** Photographs and grayscale plot of  $\text{Pb}(\text{Ac})_2$  testing papers for the  $\text{H}_2\text{S}$  detection after exposed to the reaction atmosphere for 30 min under different temperatures (Only ODE in the reaction flask).

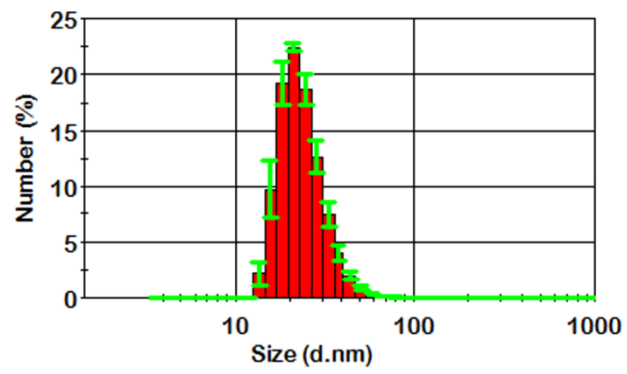

**Fig. S9** Hydrodynamic size of the water-soluble Ag<sub>2</sub>S/ZnS QDs measured by DSL.
